# Supplementary material for: A Water Soluble 2-Phenyl-5-(pyridin-3-yl)-1,3,4-oxadiazole Based Probe: Antimicrobial Activity and Colorimetric/Fluorescence pH Response
Source: MDPI journal article supplement (doi:10.3390/molecules27061824), 2022-03-11
Supplement: s1 [file s1]

# A Water Soluble 2-Phenyl-5-(pyridin-3-yl)-1,3,4-oxadiazole Based Probe. Antimicrobial Activity and Colorimetric/Fluorescence pH Response

Rosita Diana<sup>a</sup>, Ugo Caruso<sup>b\*</sup>, Luigi Di Costanzo<sup>a</sup>, Simona Concilio<sup>c</sup>, Stefano Piotto<sup>c</sup>, Lucia Sessa<sup>c</sup> and Barbara Panunzi<sup>a</sup>

<sup>a</sup> Department of Agriculture, University of Napoli Federico II, Via Università, 100 - 80055 - Portici (NA), Italy

<sup>b</sup> Department of Chemical Sciences, University of Napoli Federico II, Strada Comunale Cinthia, 26, 80126 Napoli, Italy

<sup>c</sup> Department of Pharmacy, University of Salerno, Via Giovanni Paolo II, 132, 84084 Fisciano (SA), Italy

## Supplementary Material

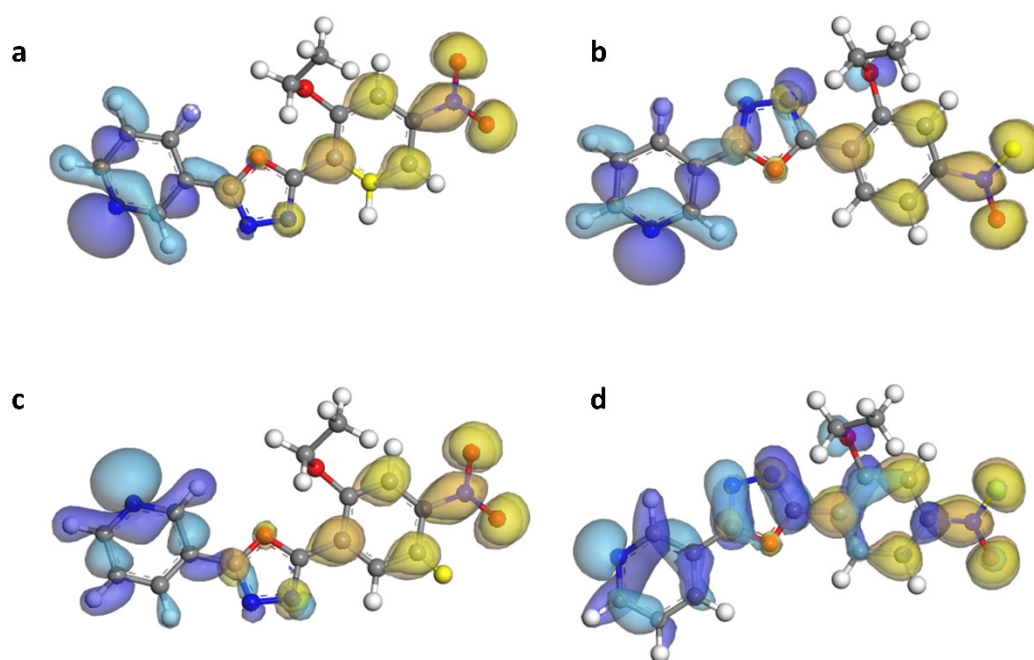

**Figure S1.** HOMO (blue and light blue) and LUMO (yellow and orange) orbitals for the four conformers of C1 (a, b, c, d) at pH 7.

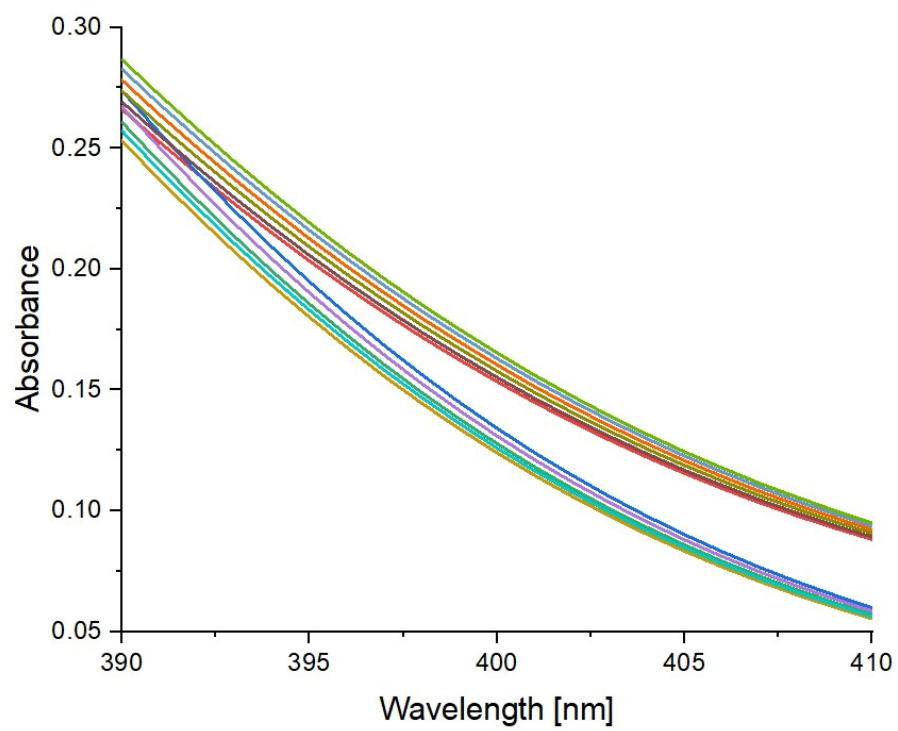

**Figure S2.** Close up of the UV-Vis absorption spectra of C1, as reported in Figure 1 (left side)
